# Supplementary material for: Validity and reliability of the Malay version multidimensional scale of perceived social support (MSPSS-M) among teachers
Source: Springer Nature journal article supplement (doi:10.1007/s11136-016-1348-9), 2016-06-27
Supplement: MOESM1 [file 10683062]

Journal of Quality of Life Research

**Validity and Reliability of the Malay Version Multidimensional Scale of Perceived Social Support (MSPSS-M) among Teachers**

S.C. Lee, F.M. Moy, N.N. Hairi

Soo Cheng Lee MBBS, MPH

Doctor of Public Health Candidate,

Department of Social and Preventive Medicine,

Faculty of Medicine,

University of Malaya, Kuala Lumpur, Malaysia

Foong Ming Moy PhD

Associate Professor,

Julius Centre University of Malaya,

Department of Social and Preventive Medicine,

Faculty of Medicine,

University of Malaya, Kuala Lumpur, Malaysia

Noran Naqiah Hairi MBBS, PhD

Associate Professor,

Julius Centre University of Malaya,

Department of Social and Preventive Medicine,

Faculty of Medicine,

University of Malaya, Kuala Lumpur, Malaysia

**Correspondence concerning this article should be addressed to:**

Foong Ming Moy Ph.D

Associate Professor,

Julius Centre University of Malaya,

Department of Social and Preventive Medicine,

Faculty of Medicine,

University of Malaya,

50603 Kuala Lumpur, Wilayah Persekutuan Kuala Lumpur, Malaysia

e-mail: [moyfm@ummc.edu.my](mailto:moyfm@ummc.edu.my), moyfm@um.edu.my

Telephone: +603-76976657

Fax numbers: +603-79674975

******included:*** *The original MSPSS, 12-item MSPSS-M and revised 8-item MSPSSM questionnaire are shown here*

**The original MSPSS**

We are interested in how you feel about the following statements. Read each statement carefully. Indicate how you feel about each statement.

Circle the “1” if you **Very Strongly Disagree**

Circle the “2” if you **Strongly Disagree**

Circle the “3” if you **Mildly Disagree**

Circle the “4” if you are **Neutral**

Circle the “5” if you **Mildly Agree**

Circle the “6” if you **Strongly Agree**

Circle the “7” if you **Very Strongly Agree**

| 1 | There is a special person who is around when I am in need. | 1 | 2 | 3 | 4 | 5 | 6 | 7 |
| --- | --- | --- | --- | --- | --- | --- | --- | --- |
| 2 | There is a special person with whom I can share my joys and sorrows. | 1 | 2 | 3 | 4 | 5 | 6 | 7 |
| 3 | My family really tries to help me. | 1 | 2 | 3 | 4 | 5 | 6 | 7 |
| 4 | I get the emotional help and support I need from my family. | 1 | 2 | 3 | 4 | 5 | 6 | 7 |
| 5 | I have a special person who is a real source of comfort to me. | 1 | 2 | 3 | 4 | 5 | 6 | 7 |
| 6 | My friends really try to help me. | 1 | 2 | 3 | 4 | 5 | 6 | 7 |
| 7 | I can count on my friends when things go wrong. | 1 | 2 | 3 | 4 | 5 | 6 | 7 |
| 8 | I can talk about my problems with my family. | 1 | 2 | 3 | 4 | 5 | 6 | 7 |
| 9 | I have friends with whom I can share my joys and sorrows. | 1 | 2 | 3 | 4 | 5 | 6 | 7 |
| 10 | There is a special person in my life who cares about my feelings. | 1 | 2 | 3 | 4 | 5 | 6 | 7 |
| 11 | My family is willing to help me make decisions. | 1 | 2 | 3 | 4 | 5 | 6 | 7 |
| 12 | I can talk about my problems with my friends. | 1 | 2 | 3 | 4 | 5 | 6 | 7 |

**The 12–item MSPSS-M Questionnaire**

Sila baca kenyataan-kenyataan berikut. Bulatkan nombor mengikut skala di bawah

| 1  Tersangat tidak setuju | 2  Sangat tidak setuju | 3  Tidak setuju | 4  Berkecuali | 5  Setuju | 6  Sangat setuju | 7  Tersangat setuju |
| --- | --- | --- | --- | --- | --- | --- |

| 1 | Ada seseorang yang istimewa bersama saya bila saya dalam keadaan yang memerlukan. | 1 | 2 | 3 | 4 | 5 | 6 | 7 |
| --- | --- | --- | --- | --- | --- | --- | --- | --- |
| 2 | Ada seseorang yang istimewa untuk saya berkongsi kegembiraan dan kesedihan. | 1 | 2 | 3 | 4 | 5 | 6 | 7 |
| 3 | Keluarga saya cuba sedaya-upaya untuk menolong saya. | 1 | 2 | 3 | 4 | 5 | 6 | 7 |
| 4 | Saya mendapat pertolongan dan sokongan emosi yang saya perlukan daripada keluarga. | 1 | 2 | 3 | 4 | 5 | 6 | 7 |
| 5 | Saya mempunyai seseorang yang istimewa yang benar-benar membuat saya selesa. | 1 | 2 | 3 | 4 | 5 | 6 | 7 |
| 6 | Kawan-kawan saya cuba sedaya-upaya untuk menolong saya. | 1 | 2 | 3 | 4 | 5 | 6 | 7 |
| 7 | Saya boleh berharap kepada kawan-kawan saya apabila sesuatu hal yang tidak baik berlaku. | 1 | 2 | 3 | 4 | 5 | 6 | 7 |
| 8 | Saya boleh bercerita tentang masalah saya dengan keluarga. | 1 | 2 | 3 | 4 | 5 | 6 | 7 |
| 9 | Saya mempunyai kawan-kawan yang saya boleh berkongsi kegembiraan dan kesedihan. | 1 | 2 | 3 | 4 | 5 | 6 | 7 |
| 10 | Ada seseorang yang istimewa dalam hidup saya yang mengambil berat tentang perasaan saya | 1 | 2 | 3 | 4 | 5 | 6 | 7 |
| 11 | Keluarga saya bersedia untuk menolong saya membuat keputusan | 1 | 2 | 3 | 4 | 5 | 6 | 7 |
| 12 | Saya boleh bercerita tentang masalah saya dengan kawan-kawan saya | 1 | 2 | 3 | 4 | 5 | 6 | 7 |

**The revised 8–item MSPSS-M Questionnaire**

Sila baca kenyataan-kenyataan berikut. Bulatkan nombor mengikut skala di bawah

| 1  Tersangat tidak setuju | 2  Sangat tidak setuju | 3  Tidak setuju | 4  Berkecuali | 5  Setuju | 6  Sangat setuju | 7  Tersangat setuju |
| --- | --- | --- | --- | --- | --- | --- |

| 1 | Ada seseorang yang istimewa untuk saya berkongsi kegembiraan dan kesedihan. | 1 | 2 | 3 | 4 | 5 | 6 | 7 |
| --- | --- | --- | --- | --- | --- | --- | --- | --- |
| 2 | Keluarga saya cuba sedaya-upaya untuk menolong saya. | 1 | 2 | 3 | 4 | 5 | 6 | 7 |
| 3 | Saya mendapat pertolongan dan sokongan emosi yang saya perlukan daripada keluarga. | 1 | 2 | 3 | 4 | 5 | 6 | 7 |
| 4 | Saya mempunyai seseorang yang istimewa yang benar-benar membuat saya selesa. | 1 | 2 | 3 | 4 | 5 | 6 | 7 |
| 5 | Kawan-kawan saya cuba sedaya-upaya untuk menolong saya. | 1 | 2 | 3 | 4 | 5 | 6 | 7 |
| 6 | Saya boleh berharap kepada kawan-kawan saya apabila sesuatu hal yang tidak baik berlaku. | 1 | 2 | 3 | 4 | 5 | 6 | 7 |
| 7 | Saya mempunyai kawan-kawan yang saya boleh berkongsi kegembiraan dan kesedihan. | 1 | 2 | 3 | 4 | 5 | 6 | 7 |
| 8 | Ada seseorang yang istimewa dalam hidup saya yang mengambil berat tentang perasaan saya | 1 | 2 | 3 | 4 | 5 | 6 | 7 |
